# Supplementary material for: Characterization of Escherichia coli and other bacteria isolated from condemned broilers at a Danish abattoir
Source: Front Microbiol. 2022 Nov 10;13:1020586. doi: 10.3389/fmicb.2022.1020586 (PMC9686377; doi:10.3389/fmicb.2022.1020586)
Supplement: Supplementary file 1 [file Data_Sheet_1.xlsx]

## Sheet: Table 1
Table 1. Genomic characterization of E. coli (N=44) isolated from broiler carcasses condemned with cellulitis, scratches and hepatitis.
Strain ID	Condmenation code	Sampling site	MLST	Serotype	Phylogroup	VirulenceFinder 2.0	Antimicrobial resistamce pattern	Plasmids replicons
1	Cellulitis 90	Muscle	48	O8:H11	A	cma cvaC gad hlyF iroN iss ompT sitA terC traT	sitABCD, mdf(A)	Col440I, IncFIB(AP001918), IncFII(pRSB107), p0111
2	Cellulitis 90	Lesion	48	O8:H11	A	cma cvaC gad hlyF iroN iss ompT sitA terC traT	sitABCD, mdf(A)	Col440I, IncFIB(AP001918), IncFII(pRSB107), p0111
3	Cellulitis 90	Bone marrow	48	O8:H11	A	cma cvaC gad hlyF iroN iss ompT sitA terC traT	sitABCD, mdf(A)	Col440I, IncFIB(AP001918), IncFII(pRSB107), p0111
4	Cellulitis 31	Muscle	117	O78:H4	G	cea celb chuA etsC hlyF hra ireA iroN iss iucC iutA lpfA ompT pic sitA terC traT	sitABCD, mdf(A)	Col156, ColpVC, IncFIB(AP001918), IncFII
5	Cellulitis 31	Lesion	366	O93:H8	B1	etpD hlyF iss lpfA ompT sitA terC	sitABCD, mdf(A)	IncFIB(AP001918), IncFIC(FII)
6	Cellulitis	Muscle	117	O161:H4	G	astA chuA cia cma etsC fyuA hlyF iha ireA iroN irp2 iss iucC iutA lpfA mchB mchC mchF ompT papA_F11 papC pic sitA terC traT vat	sitABCD, mdf(A), tet(A)	IncB/O/K/Z, IncFIB(AP001918), IncFIC(FII)
8	Cellulitis 69	Muscle	648	O25:H4	F	air astA chuA cia cvaC eilA etsC fyuA gad hlyF hra ireA iroN irp2 iss iucC iutA kpsE kpsMII_K5 lpfA mchF ompT papA_F20 papC sitA terC traT yfcV	sitABCD, mdf(A),blaTEM-1C, sul2, gyrA	IncFIB(AP001918), IncFII
9	Cellulitis 69	Lesion	648	O25:H4	F	air astA chuA cia cvaC eilA etsC fyuA gad hlyF hra ireA iroN irp2 iss iucC iutA kpsE kpsMII_K5 lpfA mchF ompT papA_F20 papC sitA terC traT yfcV	sitABCD, mdf(A),blaTEM-1C, sul2	IncFIB(AP001918), IncFII
10	Cellulitis 39	Lesion	117	O78:H4	G	cea celb chuA etsC hlyF hra ireA iroN iss iucC iutA lpfA ompT pic sitA terC traT	sitABCD, mdf(A)	Col156, IncFIB(AP001918), IncFII
11	Cellulitis 39	Bone marrow	117	O78:H4	G	cea celb chuA etsC hlyF hra ireA iroN iss iucC iutA lpfA ompT pic sitA terC terC traT	sitABCD, mdf(A)	Col156, IncFIB(AP001918), IncFII
12	Cellulitis 50	Lesion	117	O161:H4	G	astA cba chuA cia cma etsC fyuA hlyF hra iha ireA iroN irp2 iss iucC iutA lpfA mchB mchC mchF ompT papA_F11 papC pic sitA terC traT vat	sitABCD, mdf(A), tet(A)	IncFIB(AP001918), IncFIC(FII)
13	Cellulitis 50	Bone marrow	117	O161:H4	G	astA cba chuA cia cma etsC fyuA hlyF hra iha ireA iroN irp2 iss iucC iutA lpfA mchB mchC mchF ompT papA_F11 papC pic sitA terC traT vat	sitABCD, mdf(A), tet(A)	IncFIB(AP001918), IncFIC(FII)
14	Cellulitis 74	Lesion	23	O78:H4	C	cib cma cvaC fyuA gad hlyF iroN irp2 iss iucC iutA lpfA ompT sitA terC traT	cmlA1, mdf(A), sitABCD, tet(A), dfrA15, blaTEM-220, blaTEM-106, blaTEM-1B, blaTEM-135, blaTEM-126, gyrA	IncFIB(AP001918), IncFII(pCoo)
15	Cellulitis 74	Bone marrow	23	O78:H4	C	cib cma cvaC fyuA gad hlyF iroN irp2 iss iucC iutA lpfA ompT sitA terC traT	cmlA1, mdf(A), sitABCD, tet(A), dfrA15, blaTEM-220, blaTEM-106, blaTEM-1B, blaTEM-135, blaTEM-126, gyrA	IncFIB(AP001918), IncFII(pCoo)
16	Cellulitis 61	Lesion	117	O87:H4	G	cea celb chuA etsC hlyF hra ireA iroN iss iucC iutA lpfA ompT pic sitA terC traT	sitABCD, mdf(A)	Col156, IncFIB(AP001918), IncFII
17	Cellulitis 61	Bone marrow	117	O87:H4	G	cea celb chuA etsC hlyF hra ireA iroN iss iucC iutA lpfA ompT pic sitA terC traT	sitABCD, mdf(A)	Col156, IncFIB(AP001918), IncFII
18	Cellulitis 93	Lesion	101	O88:H8	B1	cba cia cma cvaC etsC gad hlyF ireA iroN iss iucC iutA lpfA mchF ompT sitA terC traT tsh	qnrS1, BlaTem-1B, sitABCD, mdf(A)	IncFIB(AP001918), IncFIC(FII), IncX1
19	Cellulitis 93	Bone marrow	101	O88:H8	B1	cba cia cma cvaC etsC etsC hlyF ireA iroN iss iucC iutA lpfA mchF ompT sitA terC traT tsh	qnrS1, BlaTem-1B, sitABCD, mdf(A)	IncFIB(AP001918), IncFIC(FII), IncX1
20	Cellulitis 80	Lesion	117	O114:H4	G	astA chuA cvaC etsC fyuA hlyF hra ireA iroN irp2 iss iss iucC iutA lpfA mchB mchC mchF ompT papC sitA terC traT tsh	BlaTem-1B, sitABCD, mdf(A)	Col156, IncFIB(AP001918), IncFIC(FII)
21	Cellulitis 80	Bone marrow	1286	O16:H32	A	cib gad iss terC	blaTEM-1B, sul2, dfrA1, dfrA1, tet(A), mdf(A)	IncI1-I(Alpha)
22	Scratches 66	Lesion	117	O78:H4	G	cea celb chuA etsC hlyF hra ireA iroN iss iucC iutA lpfA ompT pic sitA terC traT	sitABCD, mdf(A)	Col156, IncFIB(AP001918), IncFII
23	Scratches 66	Bone marrow	117	O78:H4	G	cea celb chuA etsC hlyF hra ireA iroN iss iucC iutA lpfA ompT pic sitA terC traT	sitABCD, mdf(A)	Col156, IncFIB(AP001918), IncFII
24	Scratches 84	Lesion	428	O120:H4	B2	chuA cia cvaC etsC fyuA hlyF ibeA iha iroN irp2 iss iucC iutA kpsE kpsMII_K1 mchB mchC mchF neuC ompT sitA terC traT usp vat yfcV	sitABCD, blaTEM-1C, mdf(A)	IncFII, IncFIB(AP001918)
25	Scratches 84	Bone marrow	428	O120:H4	B2	chuA cia cvaC etsC fyuA hlyF ibeA iha iroN irp2 iss iucC iutA kpsE kpsMII_K1 mchB mchC mchF neuC ompT sitA terC traT usp vat yfcV	sitABCD, blaTEM-1C, mdf(A)	IncFII, IncFIB(AP001918)
26	Scratches	Lesion	648	O25:H4	F	air astA chuA cia cvaC eilA etsC fyuA hlyF hra ireA iroN irp2 iss iucC iutA kpsE kpsMII_K5 lpfA mchF ompT papA_F20 papC sitA terC traT yfcV	sul2, mdf(A), aph(6)-Id, aph(3')-Ia, aph(3'')-Ib, tet(B), blaTEM-1C, gyrA	IncFII, IncFIB(AP001918)
27	Scratches	Lesion	1611	O159:H19	B1	cma cvaC gad hlyF iroN iss lpfA ompT sitA terC traT	sitABCD, mdf(A)	IncFII(pRSB107), IncFIB(AP001918)
28	Scratches	Lesion	11757	O4:52	A	etsC iss terC	tet(A), mdf(A)	IncFII, IncFIB(AP001918), IncFIA, p0111
29	Scratches	Lesion	69	O17:H18	D	air astA chuA cma eilA fyuA gad hra iha irp2 iss iucC iutA kpsE kpsMII_K1 lpfA neuC ompT sitA terC traT	sitABCD, mdf(A)	IncB/O/K/Z, Col8282, ColpVC
30	Scratches	Lesion	7614	O22:H19	C	astA cea cvaC etsC fyuA gad hlyF iroN irp2 iss iucC iutA lpfA mchF ompT sitA terC traT tsh	sitABCD, mdf(A)	IncFIA, IncFIB(AP001918)
31	Scratches	Lesion	648	O25:H4	F	air astA chuA cia cvaC eilA etsC fyuA gad hlyF hra ireA iroN irp2 iss iucC iutA kpsE kpsMII_K5 lpfA mchF ompT papA_F20 papC sitA terC traT yfcV	blaTEM-1C, mdf(A), tet(B), sul2, aph(6)-Id, aph(3')-Ia, aph(3'')-Ib, gyrA	IncY, IncFII, IncFIB(AP001918)
32	Scratches	Lesion	155	O29:H12	B1	cma cvaC etsC hlyF iroN iss lpfA mchF ompT papC sitA terC	mdf(A), sitABCD, dfrA14, blaTEM-1B, sul2, tet(A), aph(6)-Id, aph(3'')-Ib	IncFII, IncFIB(AP001918)
33	Scratches	Lesion	162	O134:H19	B1	astA cvaC etsC hlyF hra iroN iss iucC iutA lpfA mchF ompT papC sitA terC traT	mdf(A), sitABCD, dfrA14, blaTEM-1B, sul2, tet(A), aph(6)-Id, aph(3'')-Ib, gyrA	IncFIC(FII), IncFIB(AP001918)
34	Hepatitis 38	Lesion	2223	O75:H42	A	gad iss ompT terC traT	mdf(A)	IncI2(Delta), IncFII(29)
35	Hepatitis 38	Bone marrow	155	O9:H9	B1	cba cma etsC fyuA hlyF iha iroN irp2 iss iucC iutA lpfA mchB mchC mchF ompT sitA terC traT	sitABCD, mdf(A), gyrA	Col(MG828), IncFIA, IncFIB(AP001918), IncFII, IncFII(pHN7A8)
36	Hepatitis	Bone marrow	117	O45:H4	G	astA chuA etsC fyuA hlyF hra ireA iroN irp2 iss iucC iutA lpfA ompT papA_F20 papC pic sitA terC traT vat	tet(B), aadA1, aadA5, dfrA1, dfrA17, blaTEM-1B, sitABCD, qacE, sul2, mdf(A), gyrA	IncFIC(FII), IncFIB(AP001918)
37	Hepatitis	Lesion	212	O18:H49	B1	cib iss lpfA ompT terC	mdf(A), dfrA1, dfrA1, dfrA1, blaTEM-1B, sul2	Col156, IncI1-I(Alpha)
38	Hepatitis	Lesion	115	O102:H6	A	air astA astA cba cea cma eilA gad hra iha iss iucC iutA kpsE kpsMII_K5 sitA terC traT	sitABCD, mdf(A), gyrA	Col8282, IncFIB(pLF82-PhagePlasmid), IncI(Gamma)
39	Hepatitis	Lesion	1551	O119:H27	E	air astA chuA eilA fyuA gad hra iha irp2 iss iucC iutA mcbA ompT sitA terC traT	sitABCD, mdf(A)	IncB/O/K/Z, ColpVC, p0111
40	Hepatitis	Lesion	69	O17:H18	D	air astA celb chuA cma eilA gad hra iha iss iucC iutA kpsE lpfA ompT sitA terC traT	mdf(A), sul1, sul2, aadA1, aac(3)-Via, qacE, sitABCD	IncB/O/K/Z, Col156
41	Hepatitis	Lesion	10	O49:H32	A	astA cba celb cma fyuA gad hra iha ireA irp2 iucC iutA sitA terC traT	mdf(A), gyrA	ColpVC
42	Hepatitis	Lesion	10	O71:H48	A	afaD cia hra iss terC	mdf(A)	IncI1-I(Alpha), Col(MG828), p0111
43	Hepatitis	Lesion	5931	O1:H1	D	celb chuA cib eilA gad hra iha iss iucC iutA kpsE kpsMII lpfA mcbA ompT sitA terC traT	sitABCD, mdf(A)	Col156, IncB/O/K/Z, IncFII, Col8282, IncI1-I(Alpha), ColpVC
44	Hepatitis	Lesion	48	O76:H11	A	cma cvaC gad hlyF iroN iss ompT sitA terC traT	sitABCD, mdf(A)	IncFII, IncFIB(AP001918), p0111
45	Hepatitis	Lesion	428	O120:H4	B2	chuA cia cvaC etsC fyuA hlyF ibeA iha iroN irp2 iss iucC iutA kpsE kpsMII_K1 mchB mchC mchF neuC ompT sitA terC traT usp vat yfcV	mdf(A), sul2, blaTEM-1B, aph(6)-Id, aph(3'')-Ib	IncFII, IncFIB(AP001918), IncFII(29)
* Samples that has been collected from the same chickens, but from different sampling site (meat, bone marrow and lesion) have been clarified by adding the specific chickens ID with condemnation code.

## Sheet: Table 2
Table 2. Details information and accession numbers of the included public genomes in the phylogenetic analysis
Accession number	Sample ID	Country	Year	Host	Sample origin	Disease
SRR13949066	46	Denmark	2020	Human	Feces	---
SRR13865232	47	Denmark	2020	Human	Feces	---
SRR11848698	48	Denmark	2020	Human	Feces	---
SRR11848700	49	Denmark	2020	Human	Feces	---
SRR11849001	50	Denmark	2020	Human	Feces	---
SRR11849036	51	Denmark	2020	Human	Feces	---
SRR11849037	52	Denmark	2020	Human	Feces	---
SRR11849209	53	Denmark	2020	Human	Feces	---
SRR11849210	54	Denmark	2020	Human	Feces	---
SRR13865168	55	Denmark	2020	Human	Feces	---
SRR13865193	56	Denmark	2020	Human	Feces	---
SRR13865209	57	Denmark	2020	Human	Feces	---
SRR13865211	58	Denmark	2020	Human	Feces	---
SRR13865181	59	Denmark	2020	Human	Feces	---
SRR13865185	60	Denmark	2020	Human	Feces	---
SRR13865194	61	Denmark	2020	Human	Feces	---
SRR13865196	62	Denmark	2020	Human	Feces	---
SRR13865204	63	Denmark	2020	Human	Feces	---
SRR13865205	64	Denmark	2020	Human	Feces	---
ERR4421142	65	Denmark	2019	Human	Feces	---
ERR4129095	66	Denmark	2018	Human	Urine	---
ERR4013643	67	Denmark	2018	Human	Wound	---
ERR4013834	68	Denmark	2018	Human	Urine	---
ERR4013870	69	Denmark	2018	Human	Urine	---
ERR4013871	70	Denmark	2018	Human	Urine	---
ERR4013919	71	Denmark	2018	Human	Blood	---
ERR4013921	72	Denmark	2018	Human	Blood	---
ERR4013922	73	Denmark	2018	Human	Feces	---
ERR4013925	74	Denmark	2018	Human	Urine	---
ERR4014035	75	Denmark	2018	Human	Urine	---
ERR4014036	76	Denmark	2018	Human	Urine	---
ERR4014037	77	Denmark	2018	Human	Blood	---
ERR4014126	78	Denmark	2018	Human	Drain secretion	---
ERR4014129	79	Denmark	2018	Human	Pus	---
ERR4014137	80	Denmark	2018	Human	Urine	---
ERR4014181	81	Denmark	2018	Human	Sputum	---
ERR4014182	82	Denmark	2018	Human	Urine	---
ERR4014224	83	Denmark	2018	Human	Urine	---
ERR4014227	84	Denmark	2018	Human	Blood	---
ERR4014229	85	Denmark	2018	Human	Feces	---
ERR4014239	86	Denmark	2018	Human	Urine	---
ERR4014358	87	Denmark	2018	Human	Urine	---
ERR4014491	88	Denmark	2018	Human	Tracheal secretion	---
ERR4014492	89	Denmark	2018	Human	Urine	---
ERR4014493	90	Denmark	2018	Human	Urine	---
ERR4014494	91	Denmark	2018	Human	Urine	---
ERR4014495	92	Denmark	2018	Human	Urine	---
ERR4014496	93	Denmark	2018	Human	Urine	---
ERR4014497	94	Denmark	2018	Human	Urine	---
ERR4014504	95	Denmark	2018	Human	Muscle	---
ERR4014533	96	Denmark	2018	Human	Urine	---
ERR4014540	97	Denmark	2018	Human	Urine	---
ERR4014541	98	Denmark	2018	Human	Lesion	---
ERR4014545	99	Denmark	2018	Human	Faeces	---
ERR4014626	100	Denmark	2018	Human	Abscess	---
ERR4014634	101	Denmark	2018	Human	Lesion	---
ERR4014637	102	Denmark	2018	Human	Tissue	---
ERR4014720	103	Denmark	2018	Human	Urine	---
ERR4014721	104	Denmark	2018	Human	Urine	---
ERR4014723	105	Denmark	2018	Human	Urine	---
ERR4014726	106	Denmark	2018	Human	Blood	---
ERR4013407	107	Denmark	2018	Human	Pus	---
ERR4013500	108	Denmark	2018	Human	Abscess	---
ERR4013525	109	Denmark	2018	Human	Urine	---
ERR4013526	110	Denmark	2018	Human	Tissue	---
SRR13674893	111	Denmark	2014	Human	Urine	---
SRR13674894	112	Denmark	2014	Human	Urine	---
SRR13674895	113	Denmark	2014	Human	Urine	---
SRR13674896	114	Denmark	2014	Human	Urine	---
SRR13674897	115	Denmark	2014	Human	Urine	---
SRR13674898	116	Denmark	2014	Human	Urine	---
ERR2091304	117	Denmark	2016	poultry	Meat	---
ERR2091311	118	Denmark	2016	poultry	Meat	---
ERR2091323	119	Denmark	2016	poultry	Meat	---
ERR2091353	120	Denmark	2016	poultry	Meat	---
ERR2091393	121	Denmark	2016	poultry	Meat	---
ERR2091394	122	Denmark	2016	poultry	Meat	---
ERR5037286	123	Denmark	2015	poultry		---
SRR4997020	124	Denmark	2015	poultry	Liver	Colibacillosis
SRR4997037	125	Denmark	2015	poultry	Liver	Colibacillosis
SRR4997053	126	Denmark	2015	poultry	Bone marrow	Colibacillosis
SRR4997091	127	Denmark	2015	poultry	Bone marrow	Colibacillosis
SRR4997092	128	Denmark	2015	poultry	Bone marrow	Colibacillosis
SRR4997126	129	Denmark	2015	poultry	Liver	Colibacillosis
SRR4997135	130	Denmark	2015	poultry	Liver	Colibacillosis
SRR4997136	131	Denmark	2015	poultry	Bone marrow	Colibacillosis
SRR4997145	132	Denmark	2015	poultry	Bone marrow	Colibacillosis
SRR4997147	133	Denmark	2015	poultry	Bone marrow	Colibacillosis
SRR4997148	134	Denmark	2015	poultry	Liver	Colibacillosis
SRR4997168	135	Denmark	2015	poultry	Liver	Colibacillosis
SRR4997182	136	Denmark	2015	poultry	Bone marrow	Colibacillosis
SRR4953893	137	Denmark	2015	poultry	Liver	Colibacillosis
SRR4953896	138	Denmark	2015	poultry	Liver	Colibacillosis
SRR4953900	139	Denmark	2015	poultry	Liver	Colibacillosis
ERR2694587	140	Denmark	2015	poultry	---	---
ERR2694589	141	Denmark	2014	poultry	---	---
SRR11473314	142	Finland	2016	poultry	Bone marrow	Colibacillosis
SRR11473329	143	Finland	2016	poultry	Bone marrow	Colibacillosis
SRR11473176	144	Sweden	2015	poultry	Abdomen	Colibacillosis
SRR11473177	145	Sweden	2015	poultry	Abdomen	Colibacillosis
SRR11473178	146	Sweden	2015	poultry	Abdomen	Colibacillosis
SRR11473207	147	Sweden	2015	poultry	Abdomen	Colibacillosis
SRR11473232	148	UK	2016	poultry	Bone marrow	Colibacillosis
SRR11473233	149	UK	2016	poultry	Bone marrow	Colibacillosis
SRR11473234	150	UK	2016	poultry	Bone marrow	Colibacillosis
SRR11473235	151	UK	2016	poultry	Bone marrow	Colibacillosis
SRR11473248	152	UK	2016	poultry	Liver	Colibacillosis
ERR5443106	153	Denmark	2016	poultry	Meat	---
ERR5443107	154	Denmark	2016	poultry	Cecum	---
ERR4843837	155	Denmark	2015	poultry	---	---
ERR4843738	156	Denmark	2015	poultry	---	---
ERR4843739	157	Denmark	2015	poultry	---	---
ERR4843740	158	Denmark	2015	poultry	---	---
ERR4843741	159	Denmark	2015	poultry	---	---
ERR4843742	160	Denmark	2015	poultry	---	---
ERR4843743	161	Denmark	2015	poultry	---	---
ERR4843744	162	Denmark	2015	poultry	---	---
ERR4843745	163	Denmark	2015	poultry	---	---
ERR4843747	164	Denmark	2015	poultry	---	---
ERR4843748	165	Denmark	2015	poultry	---	---
ERR4843749	166	Denmark	2015	poultry	---	---
ERR4843836	167	Denmark	2015	poultry	---	---
Reference genome	168	----	----	----	---	---

## Sheet: Table 3
Table 3. Sequance reads quality
Strain ID	Year of isolation	Place of isolation	Sample Source	Condmenation code	Sampling site	Sample abbreviation	Raw_Read1_Total_Seq	Raw_Read1_Seq_Length	Raw_Read2_Total_Seq	Raw_Read2_Seq_Length	%GC_Raw_Reads	Trimmed_Read1_Seq_Length	Trimmed_Read1_Seq_Length	%GC_Trimmed_Reads_R1	Trimmed_Read2_Total_Seq	Trimmed_Read2_Seq_Length	%GC_Trimmed_Reads_R2	Number_Contig	N50	N75	Genome_size
1	2021	HKScan, Dk	Poultry	Cellulitis	Muscle	DM90	1273652	35-251	1273652	35-251	50	1159557	50-251	50	1159557	50-251	50	136	87354	44744	4793361
2	2021	HKScan, Dk	Poultry	Cellulitis	Lesion	DL90	774843	35-251	774843	35-251	50	655738	50-251	50	655738	50-251	49	137	86211	44744	4794855
3	2021	HKScan, Dk	Poultry	Cellulitis	Bone marrow	DB90	996622	35-251	996622	35-251	50	925240	50-251	50	925240	50-251	50	138	86211	46642	4794152
4	2020	HKScan, Dk	Poultry	Cellulitis	Muscle	DM31	1194936	35-251	1194936	35-251	50	1113085	50-251	49	1113085	50-251	49	111	174573	109015	5128705
5	2020	HKScan, Dk	Poultry	Cellulitis	Lesion	DL31	329059	35-251	329059	35-251	50	258608	50-251	49	258608	50-251	49	111	96237	56575	4714608
6	2021	HKScan, Dk	Poultry	Cellulitis	Muscle	DM83	359177	35-251	359177	35-251	50	330542	50-251	50	330542	50-251	50	174	139770	62456	5287103
8	2021	HKScan, Dk	Poultry	Cellulitis	Muscle	DM69	712626	35-251	712626	35-251	50	654855	50-251	50	654855	50-251	49	126	136126	64992	5250972
9	2021	HKScan, Dk	Poultry	Cellulitis	Lesion	DL69	873264	35-251	873264	35-251	50	809616	50-251	50	809616	50-251	49	123	136556	68701	5252749
10	2020	HKScan, Dk	Poultry	Cellulitis	Lesion	DL39	904511	35-251	904511	35-251	50	824040	50-251	49	824040	50-251	49	135	174573	87667	5174178
11	2020	HKScan, Dk	Poultry	Cellulitis	Bone marrow	DB39	1117417	35-251	1117417	35-251	50	1028612	50-251	49	1028612	50-251	49	121	167747	87667	5129136
12	2020	HKScan, Dk	Poultry	Cellulitis	Lesion	DL50	1237676	35-251	1237676	35-251	50	1140554	50-251	50	1140554	50-251	50	120	150213	78306	5172196
13	2020	HKScan, Dk	Poultry	Cellulitis	Bone marrow	DB50	1419825	35-251	1419825	35-251	50	1322607	50-251	50	1322607	50-251	50	119	154098	81394	5171525
14	2021	HKScan, Dk	Poultry	Cellulitis	Lesion	DL74	1152118	35-251	1152118	35-251	50	1067178	50-251	50	1067178	50-251	50	88	189930	93923	4951078
15	2021	HKScan, Dk	Poultry	Cellulitis	Bone marrow	DB74	654343	35-251	654343	35-251	50	577812	50-251	50	577812	50-251	50	87	196908	86938	4943323
16	2021	HKScan, Dk	Poultry	Cellulitis	Lesion	DL61	611592	35-251	611592	35-251	50	561719	50-251	49	561719	50-251	49	124	167706	89371	5124862
17	2021	HKScan, Dk	Poultry	Cellulitis	Bone marrow	DB61	1797431	35-251	1797431	35-251	50	1672951	50-251	50	1672951	50-251	50	117	174753	98036	5127137
18	2021	HKScan, Dk	Poultry	Cellulitis	Lesion	DL93	1879908	35-301	1879908	35-301	50	1812357	50-251	50	1812357	50-251	50	45	385926	257014	5059482
19	2021	HKScan, Dk	Poultry	Cellulitis	Bone marrow	DB93	1402441	35-251	1402441	35-251	50	1292469	50-251	50	1292469	50-251	49	58	308058	186724	5055390
20	2021	HKScan, Dk	Poultry	Cellulitis	Lesion	DL80	1414922	35-251	1414922	35-251	50	1328044	50-251	50	1328044	50-251	50	124	167436	74002	5197799
21	2021	HKScan, Dk	Poultry	Cellulitis	Bone marrow	DB80	295474	35-251	295474	35-251	50	276895	50-251	50	276895	50-251	50	93	175506	87787	5002307
22	2021	HKScan, Dk	Poultry	Scratches	Lesion	SL66	572321	35-251	572321	35-251	50	523416	50-251	49	523416	50-251	49	113	174753	99873	5127499
23	2021	HKScan, Dk	Poultry	Scratches	Bone marrow	SB66	1421766	35-251	1421766	35-251	50	1323466	50-251	50	1323466	50-251	50	121	171665	98036	5126457
24	2021	HKScan, Dk	Poultry	Scratches	Lesion	SL84	620198	35-251	620198	35-251	50	545494	50-251	50	545494	50-251	49	99	190542	118721	5140086
25	2021	HKScan, Dk	Poultry	Scratches	Bone marrow	SB84	1069916	35-251	1069916	35-251	50	991787	50-251	50	991787	50-251	50	105	190542	113822	5139206
26	2021	HKScan, Dk	Poultry	Scratches	Lesion	SL71	609010	35-251	609010	35-251	50	527892	50-251	49	527892	50-251	49	117	100532	47399	5263356
27	2021	HKScan, Dk	Poultry	Scratches	Lesion	SL61	390356	35-251	390356	35-251	50	340186	50-251	50	340186	50-251	50	86	196037	105046	4935302
28	2021	HKScan, Dk	Poultry	Scratches	Lesion	SL76	577268	35-251	577268	35-251	50	524036	50-251	50	524036	50-251	50	184	75102	43229	4904442
29	2021	HKScan, Dk	Poultry	Scratches	Lesion	SL92	438033	35-251	438033	35-251	50	376864	50-251	49	376864	50-251	49	235	103336	51183	5835615
30	2021	HKScan, Dk	Poultry	Scratches	Lesion	SL98	1203856	35-251	1203856	35-251	50	1095384	50-251	50	1095384	50-251	50	103	176761	71960	4979081
31	2021	HKScan, Dk	Poultry	Scratches	Lesion	SL80	464415	35-251	464415	35-251	50	426243	50-251	49	426243	50-251	49	137	131089	64992	5370785
32	2021	HKScan, Dk	Poultry	Scratches	Lesion	SL100	641684	35-251	641684	35-251	50	575325	50-251	50	575325	50-251	49	94	140207	82928	4885888
33	2021	HKScan, Dk	Poultry	Scratches	Lesion	SL74	458194	35-251	458194	35-251	50	410728	50-251	50	410728	50-251	50	114	140345	82218	4891946
34	2020	HKScan, Dk	Poultry	Hepatitis	Lesion	HL38	531167	35-251	531167	35-251	50	449624	50-251	50	449624	50-251	49	67	191707	109071	4924537
35	2020	HKScan, Dk	Poultry	Hepatitis	Bone marrow	HB38	383712	35-251	383712	35-251	50	331765	50-251	49	331765	50-251	49	94	193702	82284	5010183
36	2021	HKScan, Dk	Poultry	Hepatitis	Bone marrow	HB61	482987	35-251	482987	35-251	50	441729	50-251	50	441729	50-251	50	139	114325	67839	5148680
37	2020	HKScan, Dk	Poultry	Hepatitis	Lesion	HL49	480961	35-251	480961	35-251	50	429960	50-251	50	429960	50-251	50	88	191519	109189	4996889
38	2021	HKScan, Dk	Poultry	Hepatitis	Lesion	HL90	272813	35-251	272813	35-251	50	249609	50-251	50	249609	50-251	49	401	64677	33301	5669081
39	2021	HKScan, Dk	Poultry	Hepatitis	Lesion	HL68	284990	35-251	284990	35-251	50	245392	50-251	50	245392	50-251	49	292	123349	45111	5725348
40	2021	HKScan, Dk	Poultry	Hepatitis	Lesion	HL97	349321	35-251	349321	35-251	50	313408	50-251	49	313408	50-251	49	308	150872	54196	5611093
41	2021	HKScan, Dk	Poultry	Hepatitis	Lesion	HL98	210044	35-251	210044	35-251	50	183529	50-251	49	183529	50-251	49	369	25934	13841	5367204
42	2021	HKScan, Dk	Poultry	Hepatitis	Lesion	HL83	475549	35-251	475549	35-251	50	434398	50-251	49	434398	50-251	49	156	88373	52718	5041079
43	2021	HKScan, Dk	Poultry	Hepatitis	Lesion	HL96	661731	35-251	661731	35-251	50	599874	50-251	50	599874	50-251	49	335	110648	47764	5818279
44	2021	HKScan, Dk	Poultry	Hepatitis	Lesion	HL94	371743	35-251	371743	35-251	50	336485	50-251	50	336485	50-251	50	173	88689	48037	5818279
45	2020	HKScan, Dk	Poultry	Hepatitis	Lesion	HL52	384541	35-251	384541	35-251	50	348085	50-251	50	348085	50-251	50	197	137763	79790	5242964
